# Supplementary material
Source: Springer Nature journal article supplement (https://www.springermedizin.de/resource/supplementary/12876_2011_661_MOESM2_ESM.pdf/9437204)

## Metavir fibrosis stages

**A**

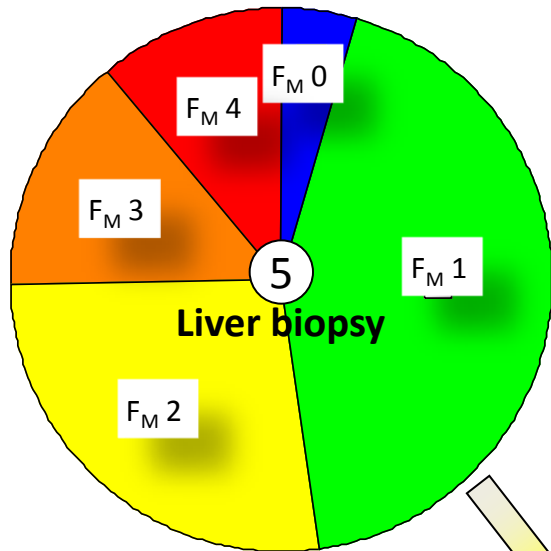

## Binary diagnosis of significant fibrosis

**B**

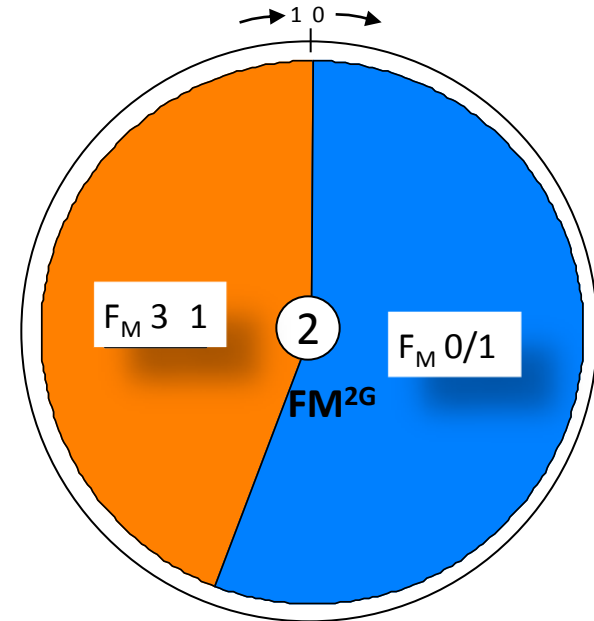

## Fibrosis class classification

**C**

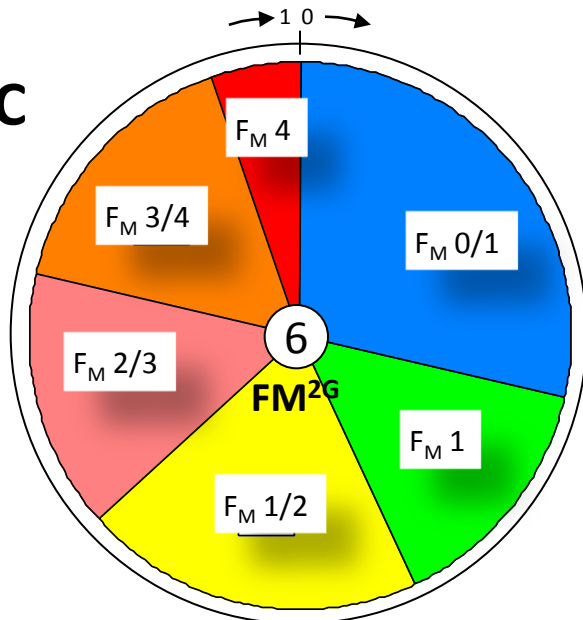

**D**

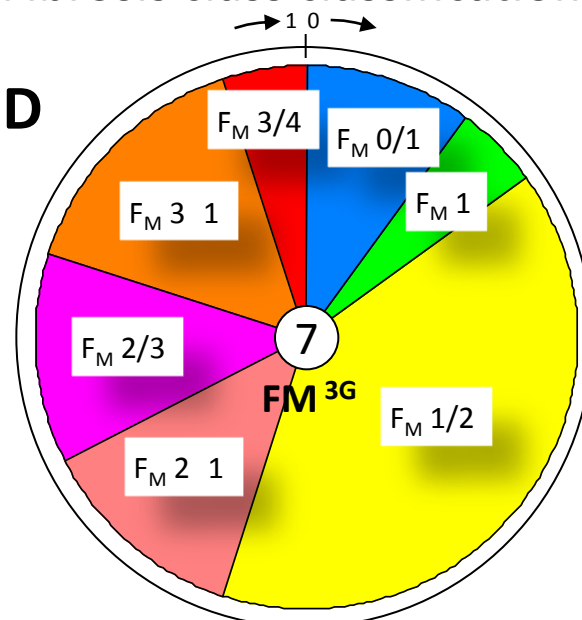

**E**

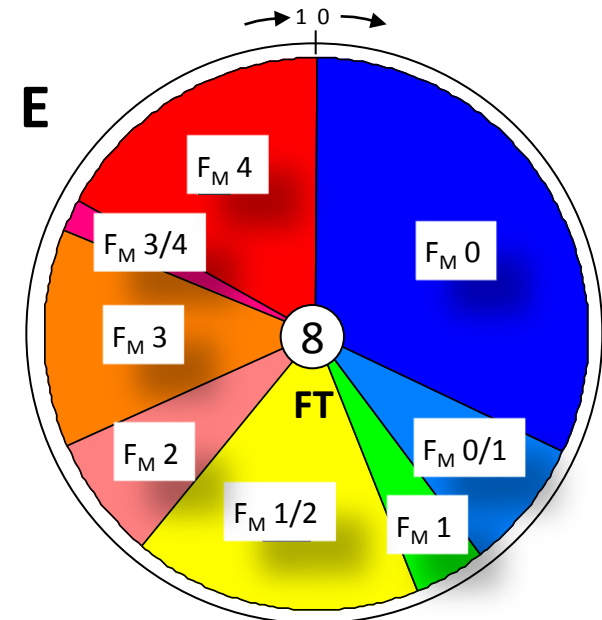

Supplement: MOESM2 [file 9437204]
